# Supplementary material
Source: ML conference proceedings conference paper supplement (https://openreview.net/forum?id=3VdSuh3sie)

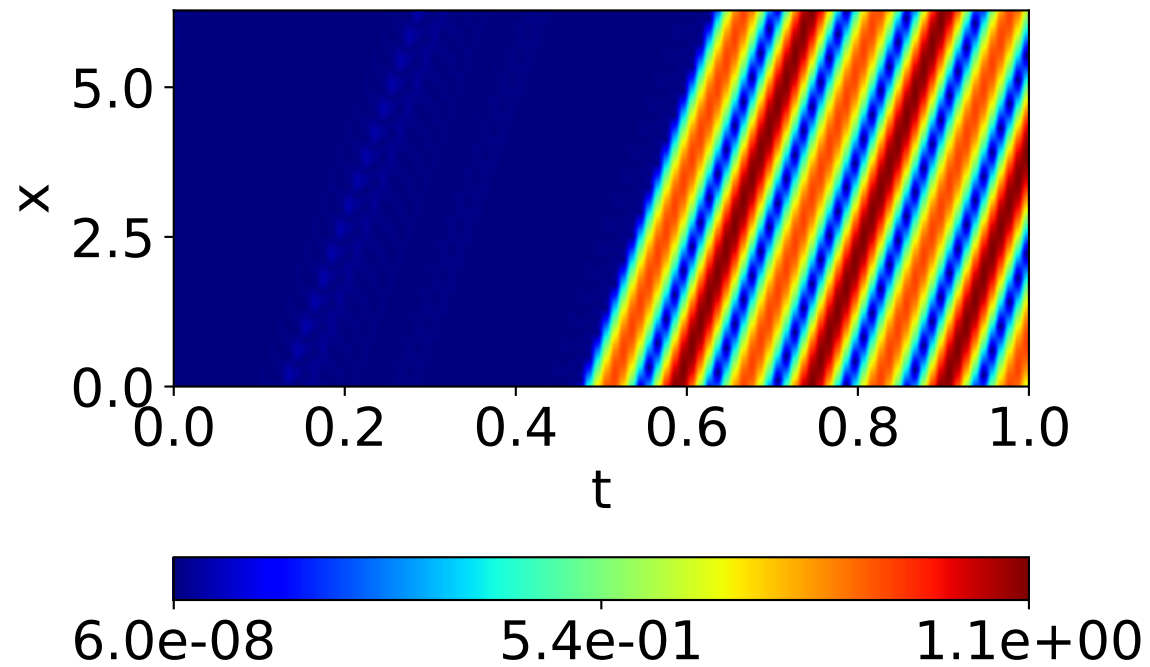

Supplement: supplementary_material [file abs_err_adv40.pdf › swimpde-paper/pinns/PINN/Advection/Experiments/Varying_beta/Results/Beta40/abs_err_adv40.pdf]

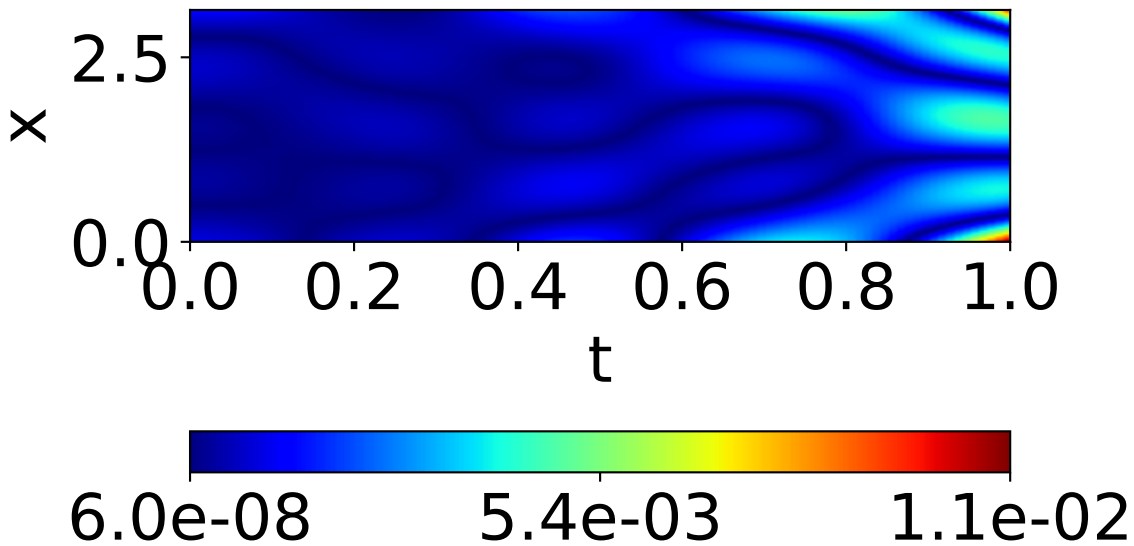

Supplement: supplementary_material [file Absolute_error.pdf › swimpde-paper/pinns/PINN/EB/Results/Figures/Absolute_error.pdf]
